# Supplementary material for: Presurgical Executive Functioning in Low-Grade Glioma Patients Cannot Be Topographically Mapped
Source: MDPI journal article supplement (doi:10.3390/cancers15030807), 2023-01-28
Supplement: s1 [file s1]

# Supplementary Tables

**Supplementary Table S1. A Spearman's rank-order correlation for the Tilburg sample**

| Minimal distance                 |                          |      |       |       |                           |      |       |        |                            |       |       |      |
|----------------------------------|--------------------------|------|-------|-------|---------------------------|------|-------|--------|----------------------------|-------|-------|------|
| <u>Cognitive tests:</u>          | SLF I<br>Right<br>(n=47) |      |       |       | SLF II<br>Right<br>(n=48) |      |       |        | SLF III<br>Right<br>(n=47) |       |       |      |
|                                  | Left<br>(n=50)           |      |       |       | Left<br>(n=50)            |      |       |        | Left<br>(n=50)             |       |       |      |
|                                  | rho                      | p <  | rho   | p <   | rho                       | p <  | rho   | p <    | rho                        | p <   | rho   | p <  |
| Shifting attention               | -.020                    | .891 | .410  | .003* | .047                      | .752 | .378  | .007** | .243                       | .097  | .209  | .146 |
| Stroop interference              | .082                     | .583 | .116  | .420  | -.092                     | .537 | .162  | .260   | -.298                      | .042* | .187  | .193 |
| Letter fluency <sup>1</sup>      | .061                     | .703 | .726  | .055  | .246                      | .122 | -.001 | .994   | .041                       | .797  | -.062 | .695 |
| Digit span forward <sup>2</sup>  | .028                     | .895 | -.277 | .211  | -.100                     | .642 | .006  | .978   | -.079                      | .715  | .175  | .437 |
| Digit span backward <sup>3</sup> | .155                     | .471 | -.022 | .922  | -.001                     | .997 | .105  | .642   | -.222                      | .298  | .075  | .739 |
| Mean diffusivity                 |                          |      |       |       |                           |      |       |        |                            |       |       |      |
| <u>Cognitive tests:</u>          | SLF I<br>Right<br>(n=45) |      |       |       | SLF II<br>Right<br>(n=47) |      |       |        | SLF III<br>Right<br>(n=47) |       |       |      |
|                                  | Left<br>(n=49)           |      |       |       | Left<br>(n=50)            |      |       |        | Left<br>(n=50)             |       |       |      |
|                                  | rho                      | p <  | rho   | p <   | rho                       | p <  | rho   | p <    | rho                        | p <   | rho   | p <  |
| Shifting attention               | -.049                    | .747 | .060  | .680  | -.067                     | .649 | .089  | .537   | -.072                      | .628  | .003  | .985 |
| Stroop interference              | -.014                    | .925 | .317  | .146  | .162                      | .275 | -.002 | .988   | .123                       | .410  | .007  | .959 |
| Letter fluency <sup>1</sup>      | -.141                    | .393 | .007  | .963  | -.225                     | .157 | -.029 | .855   | -.157                      | .328  | -.054 | .733 |
| Digit span forward <sup>2</sup>  | .154                     | .493 | .499  | .021  | -.024                     | .910 | .193  | .391   | -.099                      | .645  | .137  | .543 |
| Digit span backward <sup>3</sup> | .301                     | .174 | .355  | .155  | .202                      | .344 | .133  | .556   | .097                       | .654  | .038  | .867 |

\*\* meaning  $p < .01$ ; \* meaning  $p < .05$ ; In bold  $p < \text{BH-corrected alpha of } 0.1$ ;

<sup>1</sup> Data missing right for  $n=6$  and left for  $n=7$ .

<sup>2</sup>Data missing right for  $n=23$  and left for  $n=28$

<sup>3</sup>Data missing right for  $n=23$  and left for  $n=28$

**Supplementary Table S1. B Spearman's rank-order correlation for the Paris sample**

| Minimal distance                 |                          |      |                |      |                           |      |                |      |                            |      |                |      |                |     |
|----------------------------------|--------------------------|------|----------------|------|---------------------------|------|----------------|------|----------------------------|------|----------------|------|----------------|-----|
| <u>Cognitive tests:</u>          | SLF I<br>Right<br>(n=25) |      |                |      | SLF II<br>Right<br>(n=25) |      |                |      | SLF III<br>Right<br>(n=25) |      |                |      | Left<br>(n=30) |     |
|                                  |                          |      | Left<br>(n=30) |      |                           |      | Left<br>(n=30) |      |                            |      | Left<br>(n=30) |      |                |     |
|                                  | rho                      | p <  | rho            | p <  | rho                       | p <  | rho            | p <  | rho                        | p <  | rho            | p <  | rho            | p < |
| Shifting attention               | -.291                    | .189 | .259           | .167 | -.109                     | .629 | .293           | .116 | .009                       | .969 | .439*          | .015 |                |     |
| Stroop interference <sup>1</sup> | -.355                    | .089 | .155           | .430 | -.307                     | .145 | .130           | .510 | -.160                      | .454 | -.100          | .613 |                |     |
| Letter fluency                   | .183                     | .403 | .154           | .418 | .363                      | .089 | .178           | .347 | .424*                      | .044 | .242           | .197 |                |     |
| Digit span forward               | -.238                    | .252 | .184           | .329 | -.269                     | .194 | .174           | .358 | .040                       | .850 | .127           | .504 |                |     |
| Digit span backward              | -.142                    | .500 | .163           | .388 | -.207                     | .321 | .133           | .483 | -.083                      | .693 | -.123          | .517 |                |     |
| Mean diffusivity                 |                          |      |                |      |                           |      |                |      |                            |      |                |      |                |     |
| <u>Cognitive tests:</u>          | SLF I<br>Right<br>(n=25) |      |                |      | SLF II<br>Right<br>(n=25) |      |                |      | SLF III<br>Right<br>(n=25) |      |                |      | Left<br>(n=30) |     |
|                                  |                          |      | Left<br>(n=30) |      |                           |      | Left<br>(n=30) |      |                            |      | Left<br>(n=30) |      |                |     |
|                                  | rho                      | p <  | rho            | p <  | rho                       | p <  | rho            | p <  | rho                        | p <  | rho            | p <  | rho            | p < |
| Shifting attention               | .335                     | .128 | -.075          | .694 | .298                      | .179 | -.116          | .541 | .382                       | .079 | -.117          | .539 |                |     |
| Stroop interference <sup>1</sup> | .181                     | .398 | .044           | .826 | .061                      | .777 | -.018          | .927 | .091                       | .674 | -.038          | .848 |                |     |
| Letter fluency                   | -.186                    | .395 | .044           | .817 | -.366                     | .086 | .038           | .842 | -.153                      | .487 | .050           | .793 |                |     |
| Digit span forward               | -.173                    | .408 | .097           | .612 | -.026                     | .903 | .317           | .087 | -.003                      | .990 | .201           | .288 |                |     |
| Digit span backward              | -.047                    | .825 | .031           | .869 | .024                      | .908 | .129           | .496 | .014                       | .948 | -.071          | .709 |                |     |

\*\* meaning  $p < .01$ ; \* meaning  $p < .05$ ; In bold  $p < \text{BH-corrected alpha of } 0.1$ ;

<sup>1</sup> Data missing right for  $n=1$  and left for  $n=2$ .

**Supplementary Table S1. C Spearman's rank-order correlation for the merged sample**

| Minimal distance                 |                          |      |        |      |                           |      |        |      |                            |      |       |      |
|----------------------------------|--------------------------|------|--------|------|---------------------------|------|--------|------|----------------------------|------|-------|------|
| <u>Cognitive tests:</u>          | SLF I<br>Right<br>(n=71) |      |        |      | SLF II<br>Right<br>(n=71) |      |        |      | SLF III<br>Right<br>(n=71) |      |       |      |
|                                  | Left<br>(n=80)           |      |        |      | Left<br>(n=80)            |      |        |      | Left<br>(n=80)             |      |       |      |
|                                  | rho                      | p <  | rho    | p <  | rho                       | p <  | rho    | p <  | rho                        | p <  | rho   | p <  |
| Shifting attention <sup>1</sup>  | -.082                    | .499 | .328** | .003 | -.042                     | .727 | .365** | .001 | .191                       | .113 | .278* | .012 |
| Stroop interference <sup>2</sup> | -.047                    | .699 | .125   | .276 | -.166                     | .166 | .155   | .175 | -.231                      | .052 | .085  | .460 |
| Letter fluency <sup>3</sup>      | .104                     | .412 | .102   | .392 | .254*                     | .042 | .084   | .482 | .173                       | .172 | .113  | .342 |
| Digit span forward <sup>4</sup>  | -.116                    | .427 | -.068  | .632 | -.150                     | .303 | .027   | .848 | -.016                      | .915 | .120  | .396 |
| Digit span backward <sup>5</sup> | -.016                    | .914 | .048   | .737 | -.056                     | .704 | .071   | .615 | -.109                      | .455 | -.030 | .835 |
| Mean diffusivity                 |                          |      |        |      |                           |      |        |      |                            |      |       |      |
| <u>Cognitive tests:</u>          | SLF I<br>Right<br>(n=69) |      |        |      | SLF II<br>Right<br>(n=71) |      |        |      | SLF III<br>Right<br>(n=71) |      |       |      |
|                                  | Left<br>(n=79)           |      |        |      | Left<br>(n=80)            |      |        |      | Left<br>(n=80)             |      |       |      |
|                                  | rho                      | p <  | rho    | p <  | rho                       | p <  | rho    | p <  | rho                        | p <  | rho   | p <  |
| Shifting attention <sup>1</sup>  | -.029                    | .817 | .058   | .612 | -.085                     | .482 | .046   | .687 | -.078                      | .523 | .020  | .858 |
| Stroop interference <sup>2</sup> | .130                     | .289 | .199   | .083 | .164                      | .173 | .089   | .439 | .150                       | .212 | .119  | .301 |
| Letter fluency <sup>3</sup>      | -.135                    | .296 | .025   | .833 | -.248*                    | .048 | .002   | .984 | -.170                      | .180 | .024  | .840 |
| Digit span forward <sup>4</sup>  | -.027                    | .857 | .329*  | .018 | -.034                     | .819 | .326*  | .018 | -.035                      | .812 | .231  | .099 |
| Digit span backward <sup>5</sup> | .089                     | .550 | .165   | .247 | .099                      | .550 | .159   | .260 | .030                       | .837 | .002  | .991 |

\*\* meaning  $p < .01$ ; \* meaning  $p < .05$ ; In bold  $p < \text{BH-corrected alpha of } 0.1$ ;

<sup>1</sup> Data missing right for  $n=1$  and left for  $n=0$

<sup>2</sup> Data missing right for  $n=0$  and left for  $n=2$

<sup>3</sup> Data missing right for  $n=7$  and left for  $n=7$

<sup>4</sup> Data missing right for  $n=21$  and left for  $n=18$

<sup>5</sup> Data missing right for  $n=21$  and left for  $n=18$

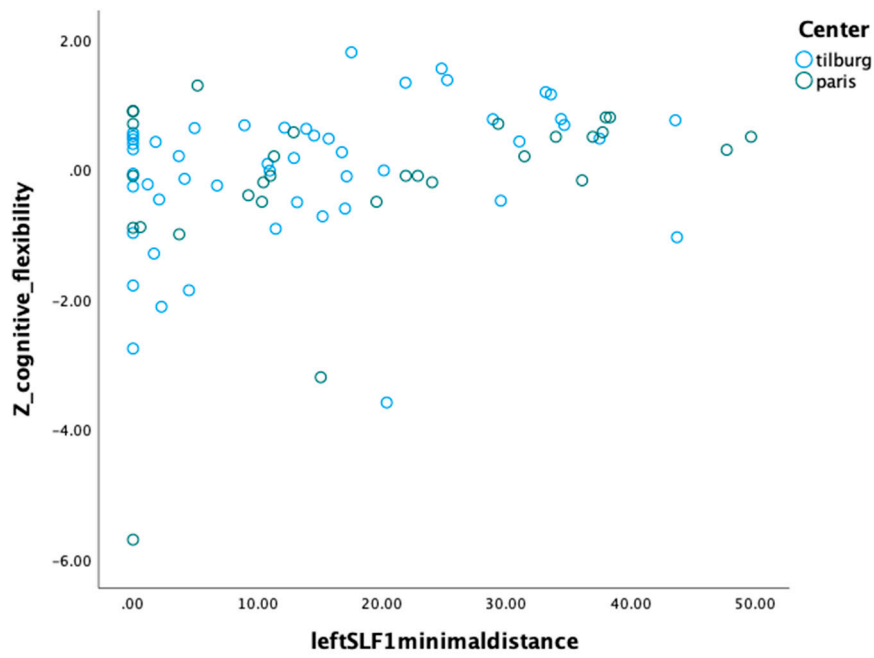

(A)

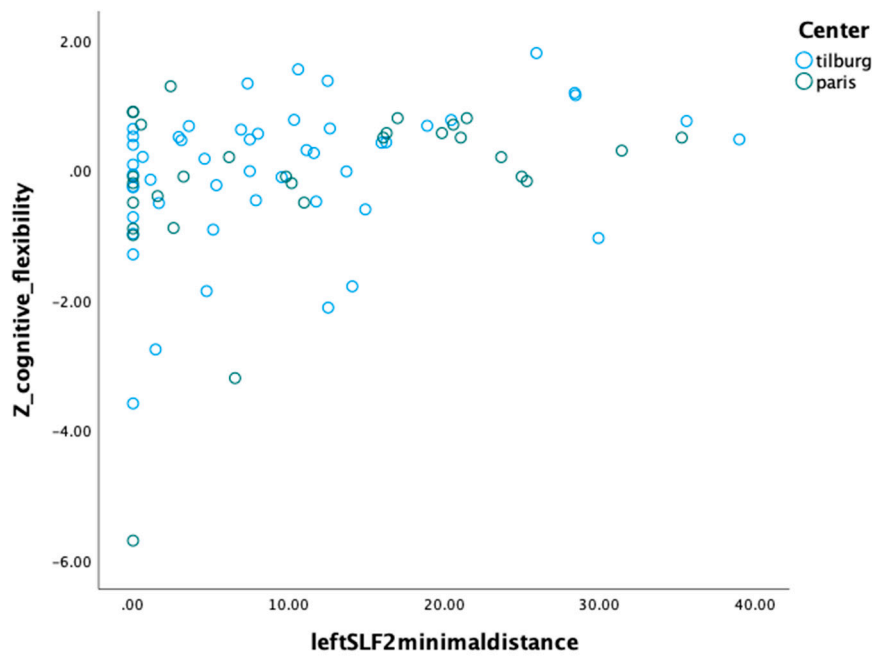

(B)

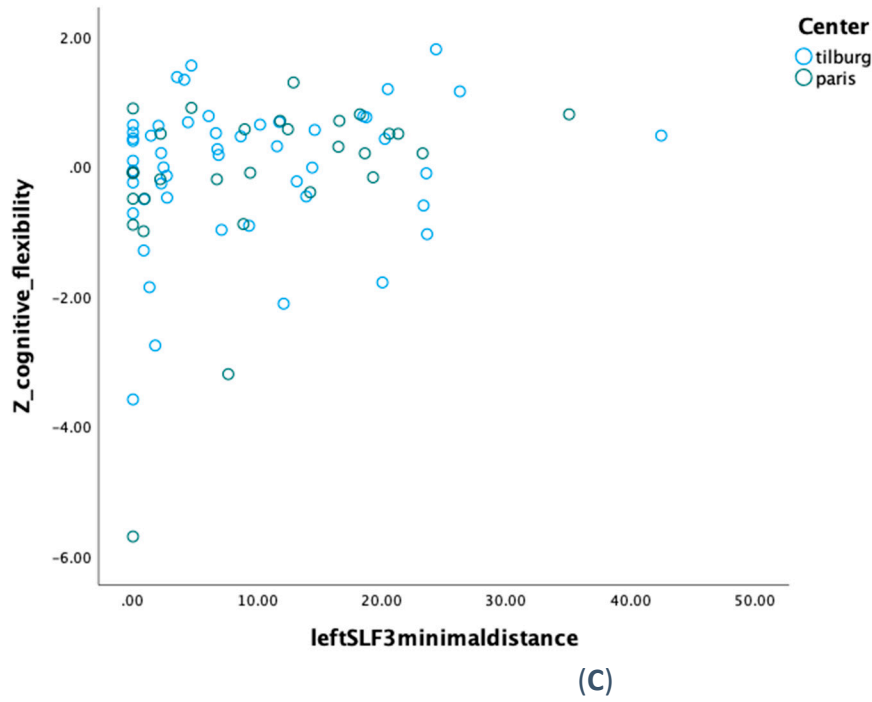

**Figure S1. (A). Scatterplot for minimal distance of the left SLF I (X-axis) and z-scores of cognitive flexibility (TMT for Paris sample and Shifting attention task for Tilburg sample). (B). Scatterplot for minimal distance of the left SLF II (X-axis) and z-scores of cognitive flexibility (TMT for Paris sample and Shifting attention task for Tilburg sample). (C). Scatterplot for minimal distance of the left SLF III (X-axis) and z-scores of cognitive flexibility (TMT B-A for Paris sample and Shifting attention task Tilburg sample).**
